# Supplementary material for: Biomimetic and Bioactive Small Diameter Tubular Scaffolds for Vascular Tissue Engineering
Source: MDPI journal article supplement (doi:10.3390/biomimetics7040199), 2022-11-14
Supplement: s1 [file s1]

**Table S1.** Storage modulus (E'), loss modulus (E'') and tan delta of GGE scaffolds, measured by DMA at three different frequencies (1, 3.5 and 10 Hz), after scaffold sterilization by gamma irradiation.

|        | E' (Pa)                       | E'' (Pa)                      | Tan $\delta$    |
|--------|-------------------------------|-------------------------------|-----------------|
| 1 Hz   | $(5.21 \pm 0.15) \times 10^4$ | $(5.18 \pm 0.06) \times 10^3$ | $0.10 \pm 0.02$ |
| 3.5 Hz | $(5.38 \pm 0.04) \times 10^4$ | $(5.46 \pm 0.09) \times 10^3$ | $0.10 \pm 0.01$ |
| 10 Hz  | $(5.73 \pm 0.07) \times 10^4$ | $(5.70 \pm 0.04) \times 10^3$ | $0.10 \pm 0.01$ |
